# Supplementary material
Source: publisher figshare collection journal article supplement (https://aacr.figshare.com/articles/dataset/_/22430332)
Supplement: Supplementary file 1 [file 39876664]

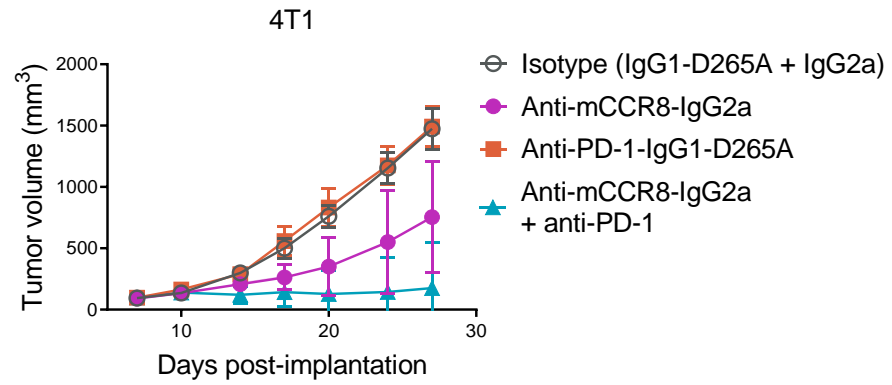

**Supplemental Figure 7:** Mean growth curves of subcutaneous 4T1 (n= 10 per group) tumors treated with isotype control antibodies, anti-mCCR8-IgG2a, anti-PD-1, or the combination of anti-mCCR8-IgG2a and anti-PD-1 antibodies at 0.2 mg/mouse/treatment at day 7, 10 and 14 after tumor implantation.
